# Supplementary material for: Integration of biomimetic organoid-on-chip and 2D models advances the mechanistic understanding of STEAP3-mediated regulation in intestinal viral infection
Source: Research Square preprint supplement (doi:10.21203/rs.3.rs-6585215/v1), 2025-05-13
Supplement: Supplementary file 1 [file fd3c39168107c9ccc8d6a73a.docx]

**Supplemental information**

**Title**

Integration of biomimetic organoid-on-chip and 2D models advances the mechanistic understanding of STEAP3-mediated regulation in intestinal viral infection

**Authors:**

Yi-Wen Chen1,2,3, Huan-Jung Chiang4,5, Kuan-Ting Liu4,6, Chun-Wei Kao1, Shan-Ren Xie1, Chao-Ming Su1 and Yu-Yin Shih1,4*

**Affiliations:**

1. Research & Development Center for *x*-Dimensional Extracellular Vesicles, China Medical University Hospital, Taichung, 404332, Taiwan

2. Department of Bioinformatics and Medical Engineering, Asia University, Taichung, 41354, Taiwan

3. Graduate Institute of Biomedical Sciences, China Medical University, Taichung, 406040, Taiwan

4. Research Center for Emerging Viral Infections, College of Medicine, Chang Gung University, Taoyuan, 33302, Taiwan

5. Department of Medical Biotechnology & Laboratory Science, College of Medicine, Chang Gung University, Taoyuan, 33302, Taiwan

6. Department of Microbiology & Immunology, School of Medicine, Stanford University, Stanford, CA, 94305, USA

*Corresponding author: ami8824@gmail.com


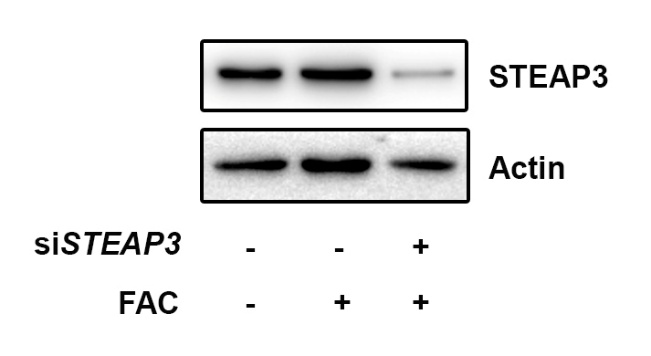


**Suppl Fig. 1** Expressional levels of STEAP3 protein in Caco-2 cells transfected with or without *siSTEAP3* siRNA in the presence or absence of FAC (100 µM).


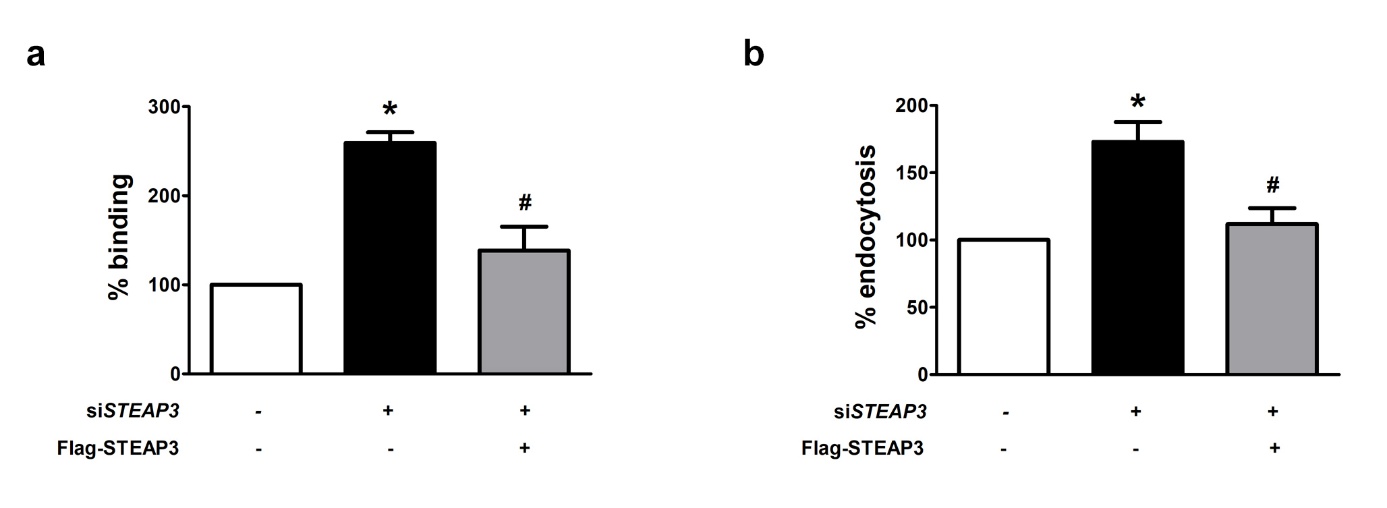


**Suppl Fig. 2** Rescue of increased viral entry in *STEAP3*-deficient RD cells by reconstitution of STEAP3 expression. Cells were knockdown with siRNA for 24 h and then transfected with pIRES2-Flag-*STEAP3* for an additional 24 h. Virus binding (A) and internalization assays (B) were conducted. **p* < 0.05 compared to siControl-transfected cells without overexpression of STEAP3. #*p* < 0.05 versus siSTEAP3-transfected cells without overexpression of STEAP3 using the student’s *t*-test. All data are shown as the mean (± s.d.).

**.**


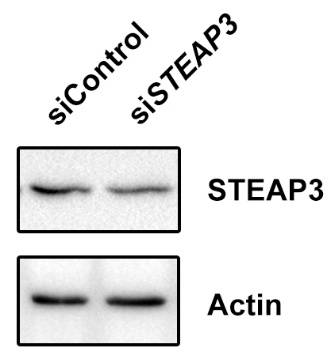


**Suppl Fig. 3** STEAP3 expression in Caco-2 cells knockdown with siRNA targeting to control or *STEAP3*.


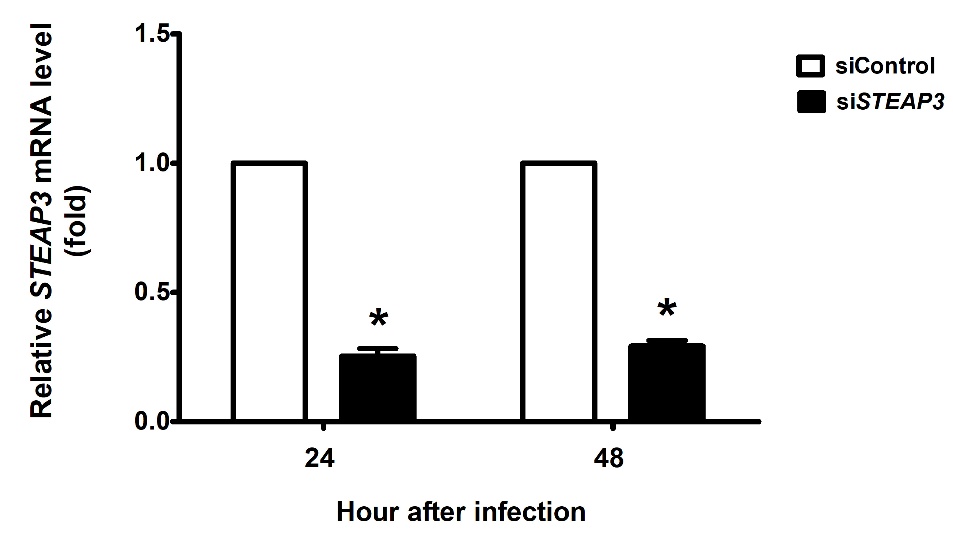


**Suppl Fig. 4** The expression level of *STEAP3* mRNA in calu-3 cells transfected with siControl or si*STEAP3* for 24 and 48 h. **p*< 0.05 versus siControl-transfected cells using the student’s *t*-test. All data are shown as the mean (± s.d.).


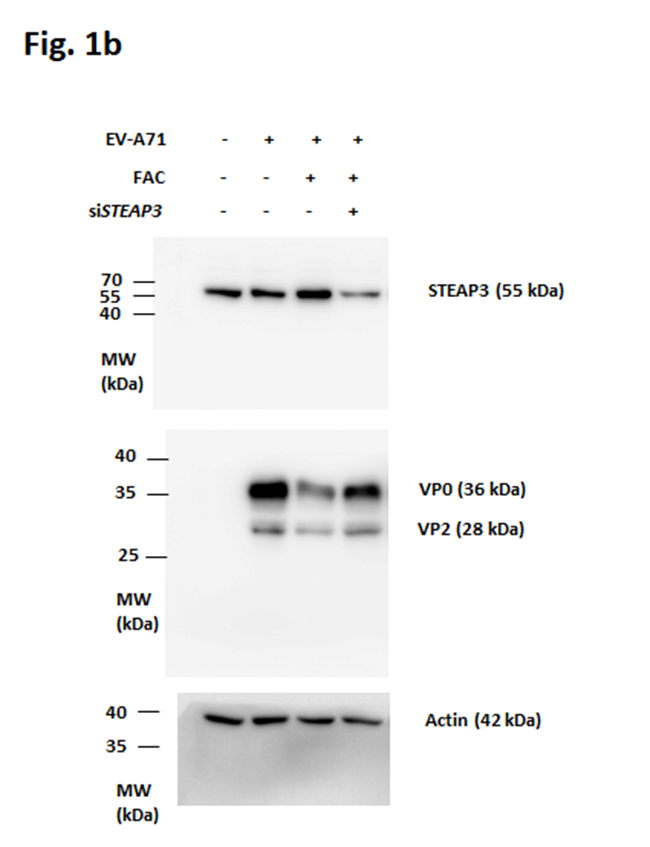


Uncropped and unprocessed blots are presented in Fig. 1B.


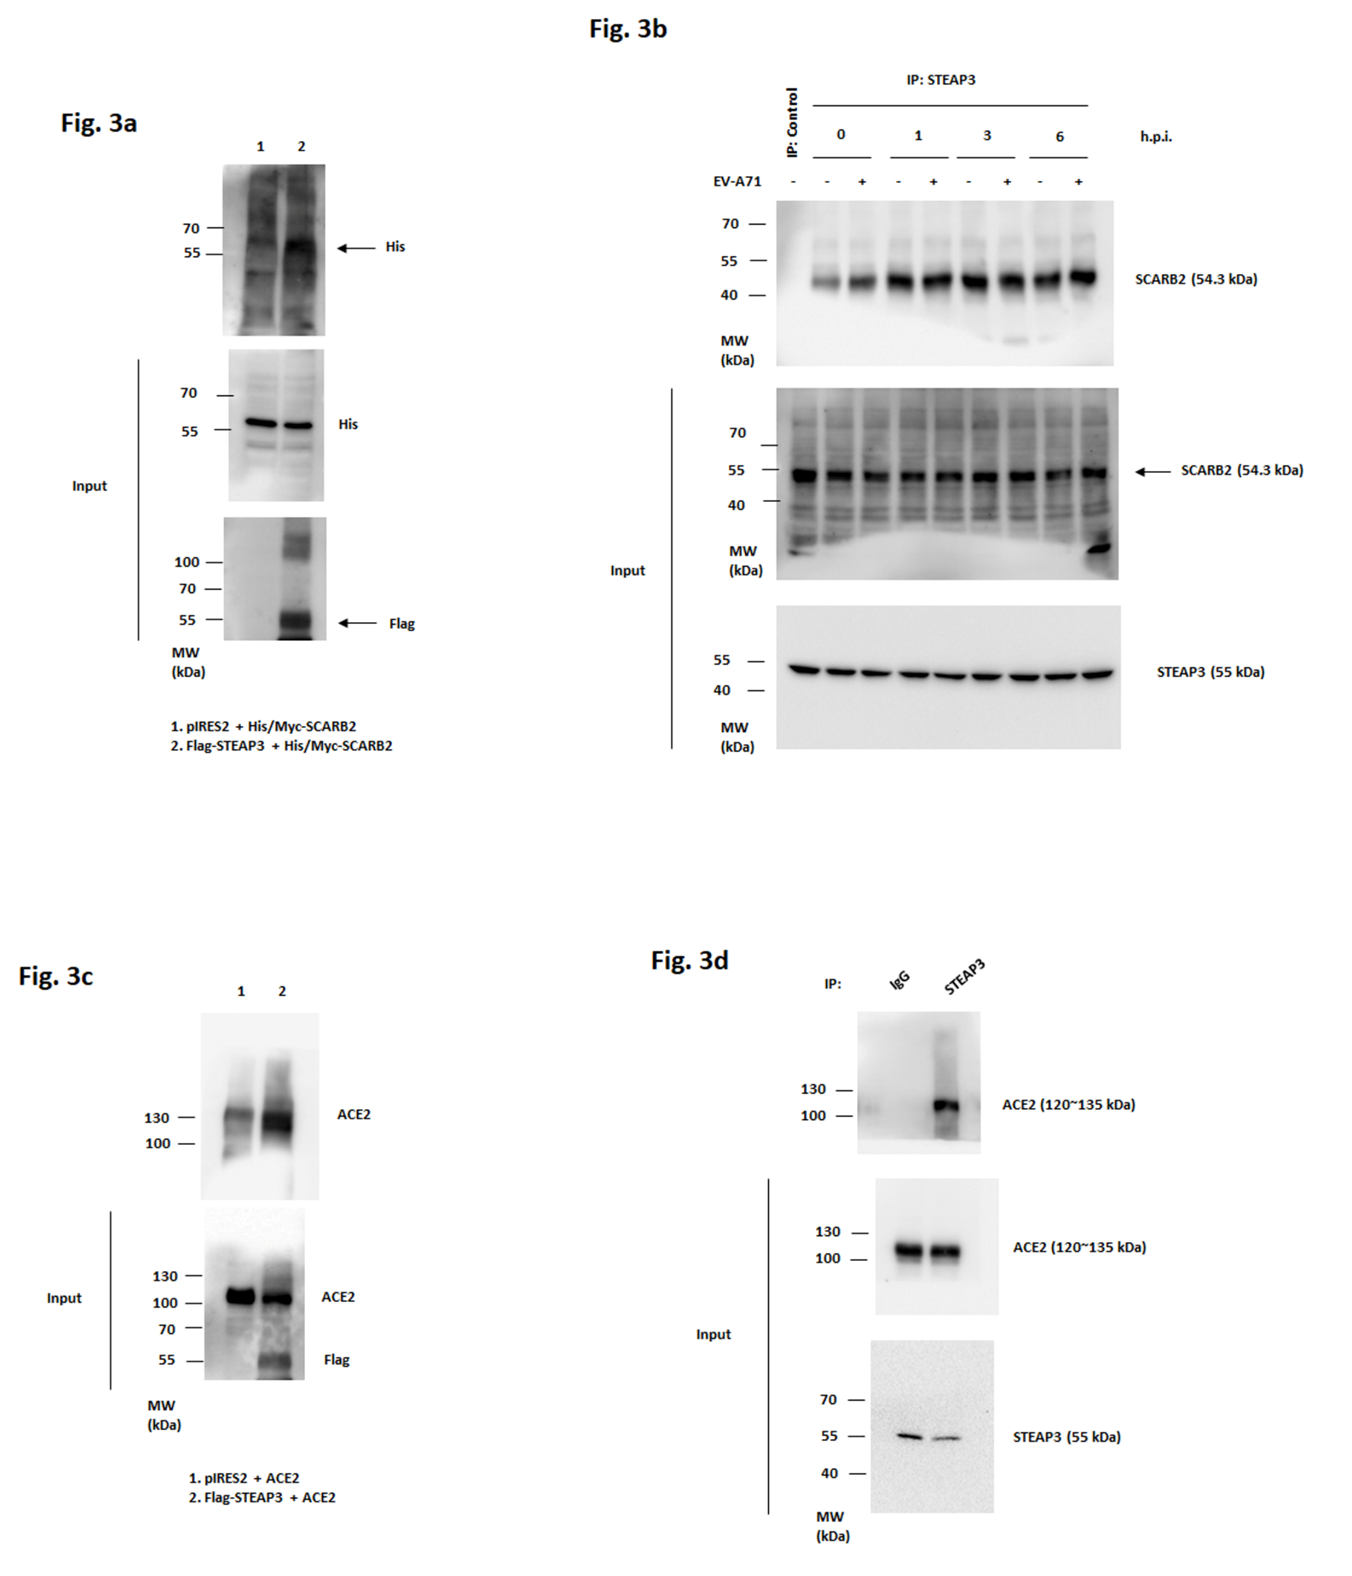


Uncropped and unprocessed blots are presented in Fig. 3.


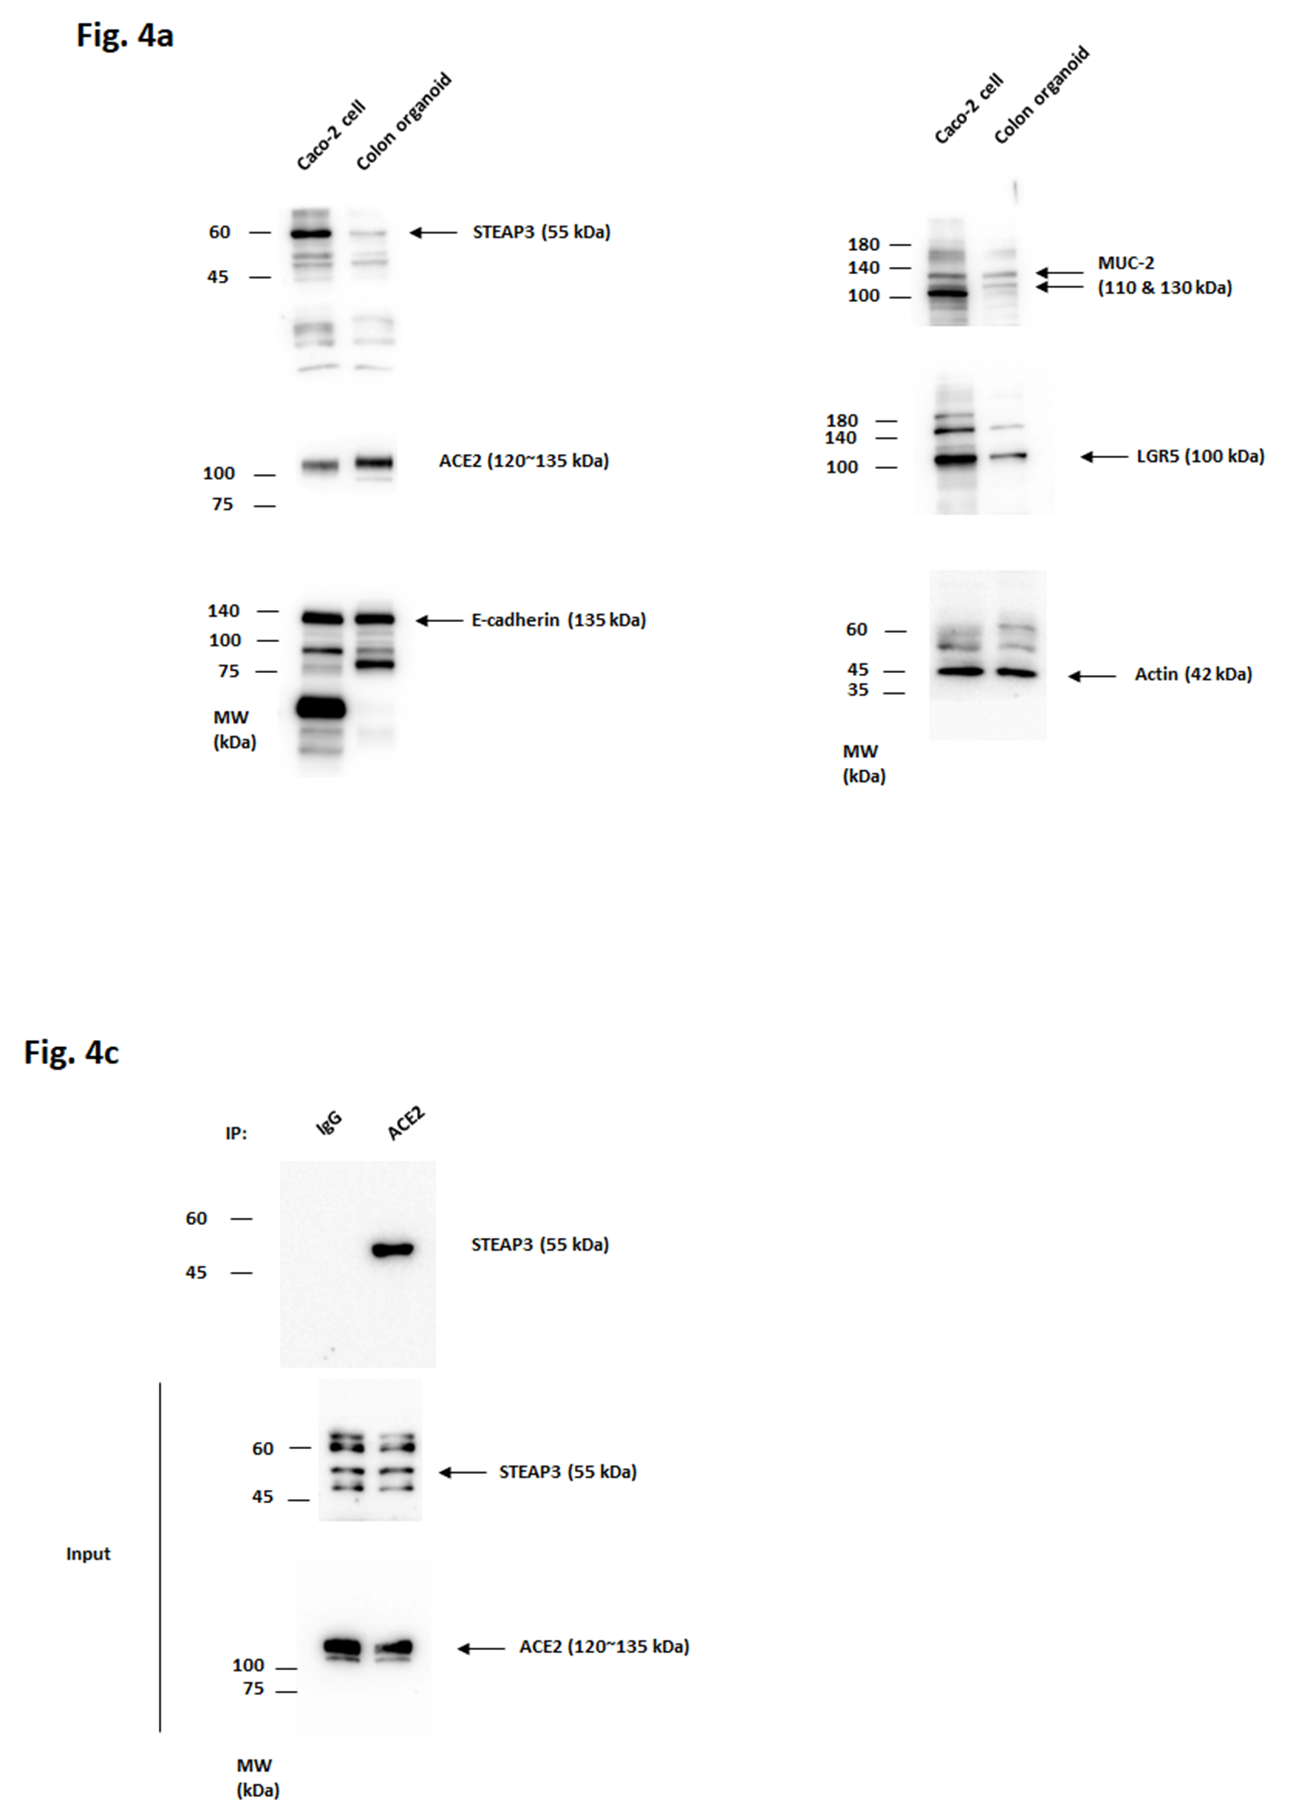


Uncropped and unprocessed blots are presented in Fig. 4.


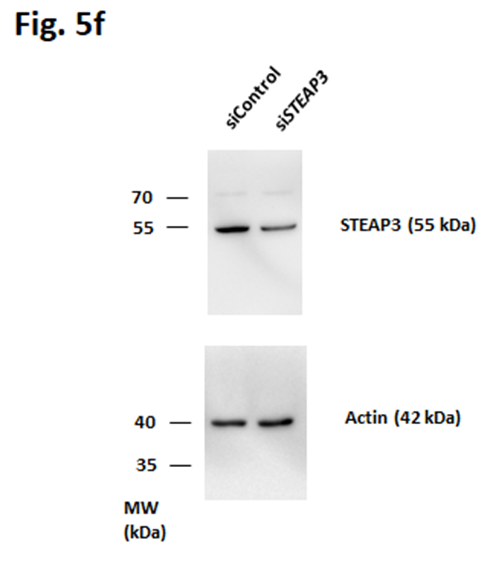


Uncropped and unprocessed blots are presented in Fig. 5F.
